# Supplementary material
Source: MDPI journal article supplement (https://www.mdpi.com/2073-4468/6/3/12)
Supplement: s1 [file s1]

## Supplementary Materials:

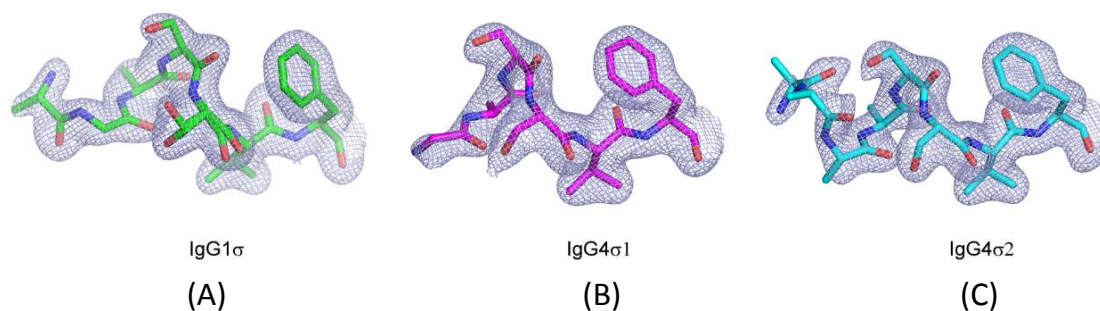

**Figure S1.** Electron density map about lower hinge residues. 2mFo-DFc density contoured at 1 $\sigma$  is shown carved at a distance of 1.5 Å about IgG1 $\sigma$  residues A235-F241 (**left**, green stick), IgG4  $\sigma$ 1 residues G236-F241 (**middle**, magenta stick), and IgG4  $\sigma$ 2 residues E233-F241 (**right**, cyan stick) from chain B.

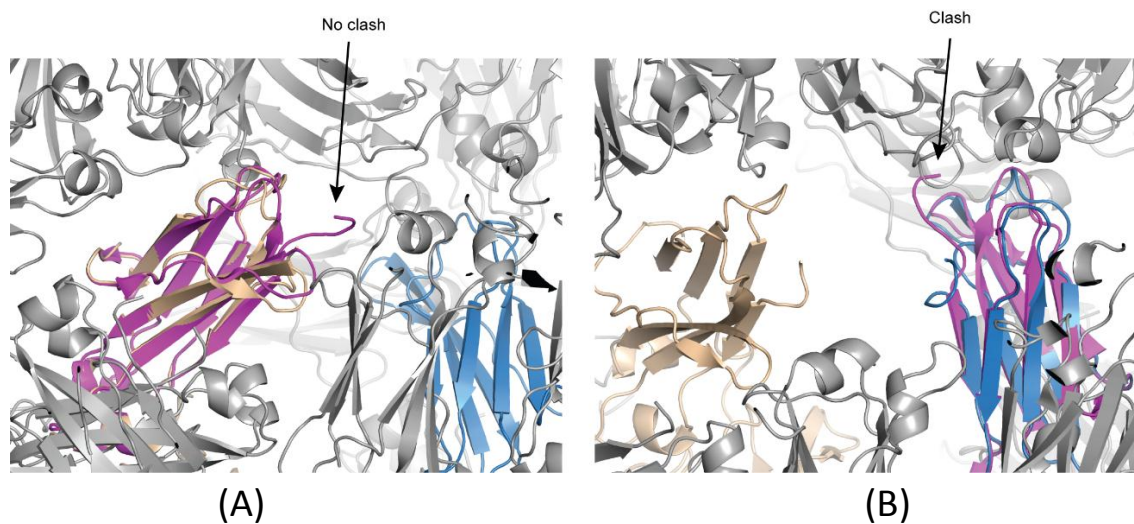

**Figure S2.** Altered lower hinge conformation of huIgG1 $\sigma$  is not a requirement of crystal packing. CH<sub>2</sub> domain from wild-type huIgG1 (3AVE [40], chain A, magenta cartoon) is aligned to CH<sub>2</sub> domain from huIgG1 $\sigma$  chain A (**left**, wheat cartoon) and chain B (**right**, sky blue cartoon). Symmetry related copies of huIgG1 $\sigma$  Fc are shown in the grey cartoon.

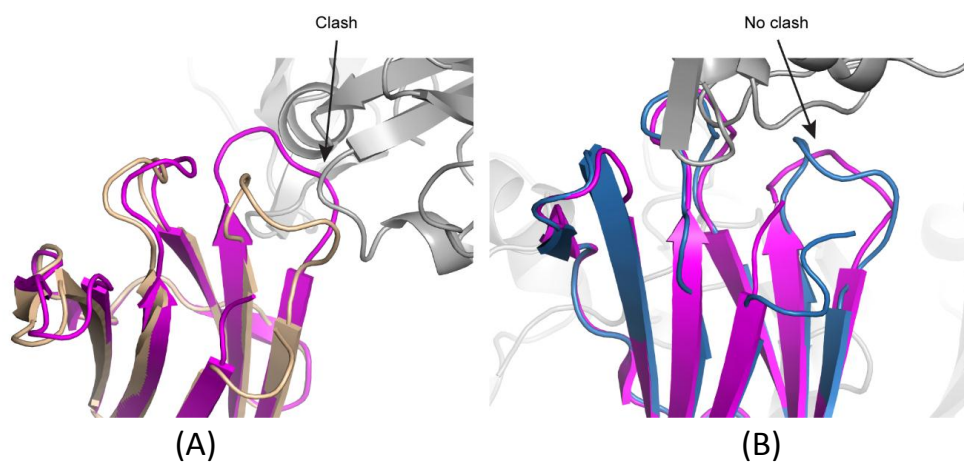

**Figure S3.** Crystal packing does not prevent IgG1 $\sigma$  FG loop from adopting a flipped-out conformation. CH2 domain from huIgG2 $\sigma$  (4L4J) [29], chain A, magenta cartoon) is aligned to CH2 domain from huIgG1 $\sigma$  chain A (**left**, wheat cartoon) and chain B (**right**, sky blue cartoon). Symmetry related copies of huIgG1 $\sigma$  Fc are shown in the grey cartoon.

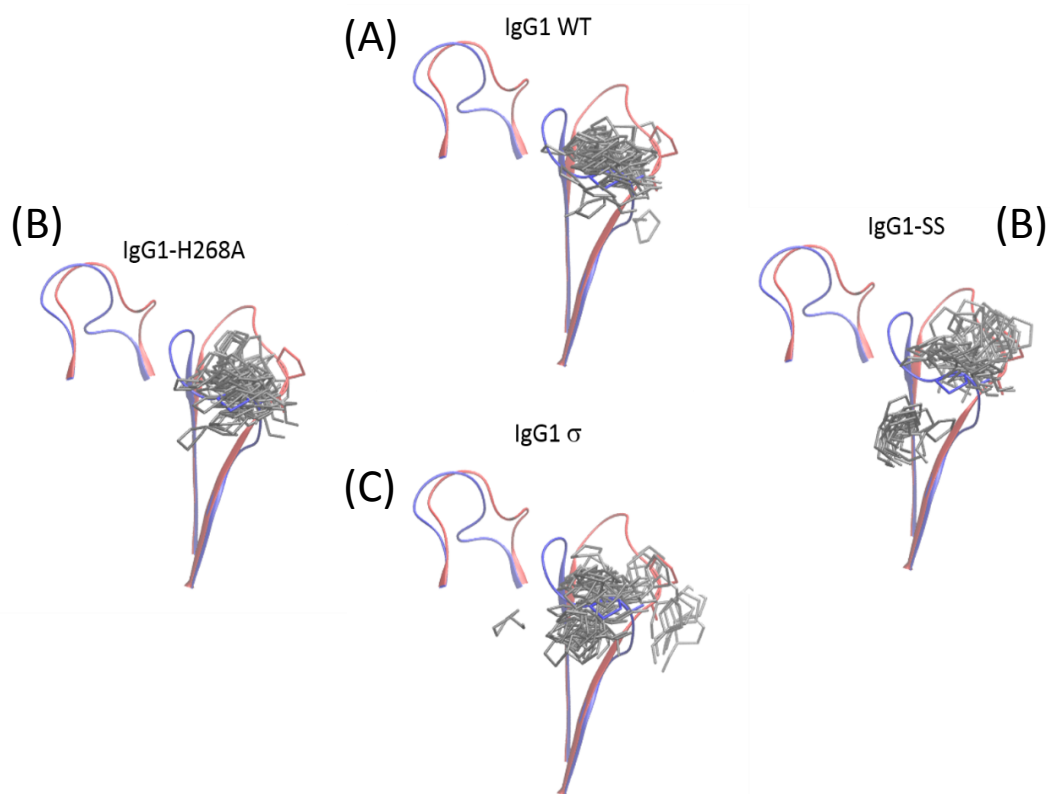

**Figure S4.** Conformation distribution of P329. Conformations of the non-hydrogen atoms of P329 in the fifty FG loop conformations shown in Figure 15.

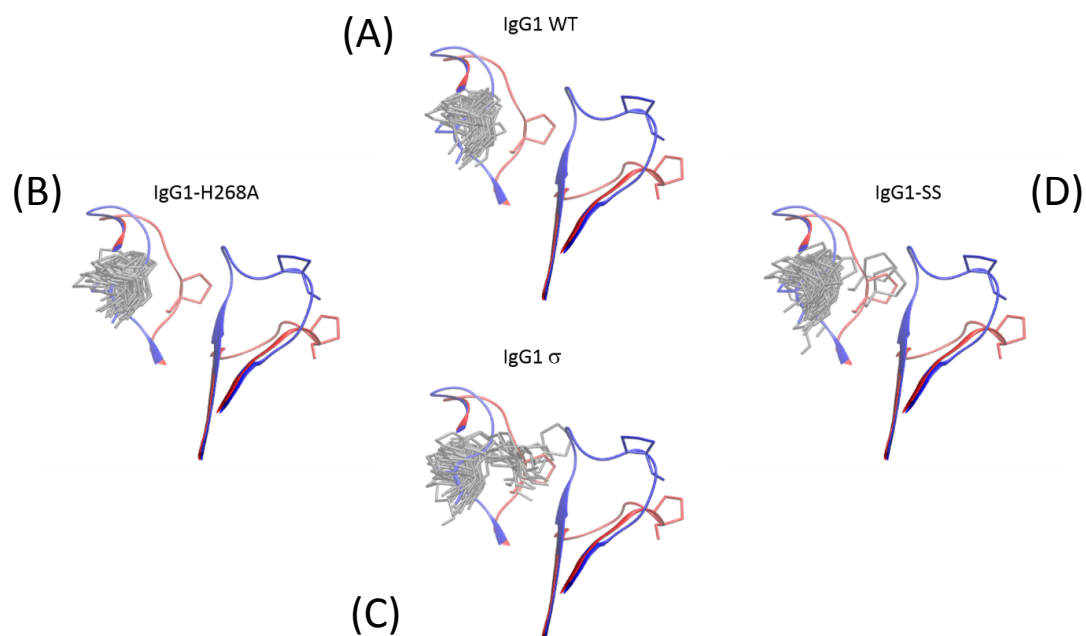

**Figure S5.** Conformation distribution of P271. Conformation of the non-hydrogen atoms of P271 in the fifty BC loop conformations shown in Figure 16.

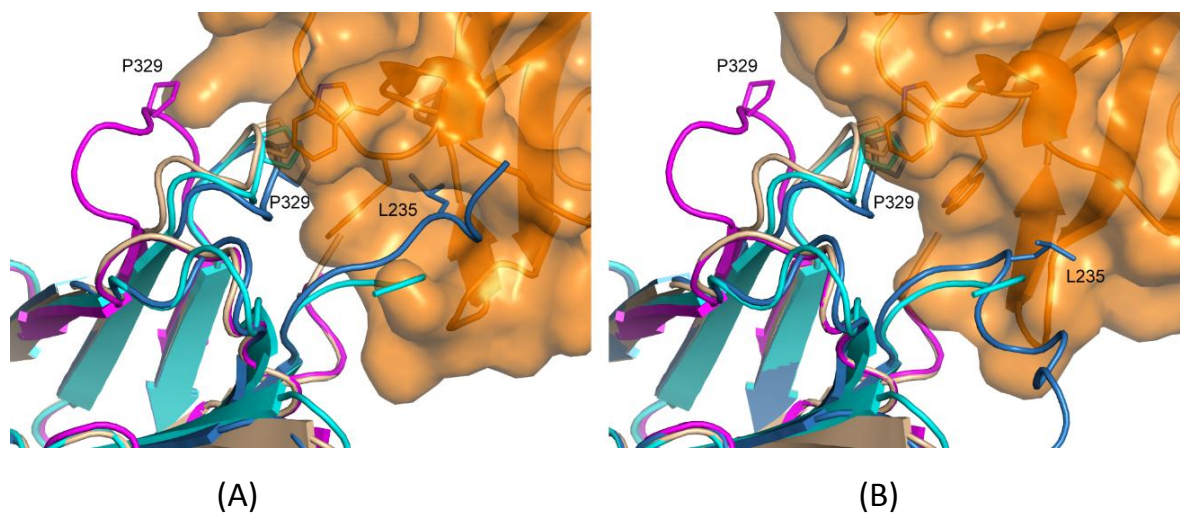

**Figure S6.** Interaction of lower hinge and FG loop with Fc $\gamma$ R. Fc (blue, cartoon) is shown in complex with receptor (orange, cartoon and transparent surface) Fc $\gamma$ RI (**left**) or Fc $\gamma$ RIIIa (**right**) from PDBs 4W4O [51] and 3SGJ [47], respectively. Fc lower hinge residue L235 and FG loop residue P329 are shown in stick and labeled. Ch<sub>2</sub> domains from apo crystal structures of wild-type huIgG1 (3AVE chain A [40]; cyan cartoon), huIgG1 $\sigma$  Fc (chain B; wheat cartoon) and IgG4 $\sigma$ 1 Fc (chain B; magenta cartoon) are shown aligned to the Ch<sub>2</sub> domain of the receptor bound Fc with residue P329 shown in stick, labeled.

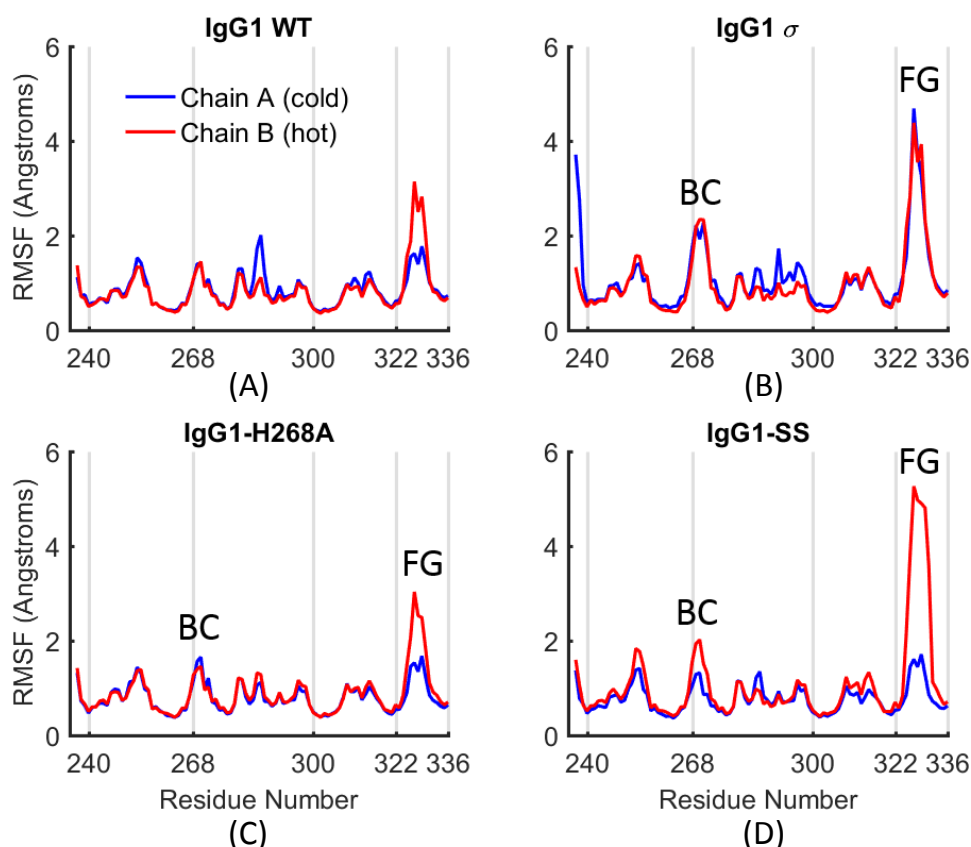

**Figure S7.** REST MD enhances loop sampling. Root mean squared fluctuations (RMSF) of the C $\alpha$  atoms for the two chains of C $H$ 2 domain from molecular dynamics simulations. The REST MD simulations were designed to increase the sampling of the BC and FG loops of chain B which constituted the hot regions of the simulation; chain A (blue) was cold. RMSF for a given chain is calculated after aligning the trajectories on the C $\alpha$  atoms of the non-BC and non-FG loop residues of that chain. REST MD substantially improves the sampling of the FG loop in all simulations except IgG1 $\sigma$ ; impact on the sampling of the BC loop are relatively modest.

**Table S1.** Cynomolgus monkey PK parameters for Ab2.

| Ab2 (IgG1 WT)* | Animals (F, M) | Dose (mg/kg) | Half-life $\pm$ SD (d) | CL $\pm$ SD (mL/day/kg) |
|----------------|----------------|--------------|------------------------|-------------------------|
| 2009 study     | 3              | 1.5          | 11.8 $\pm$ 4.2         | 4.72 $\pm$ 1.06         |
| 2010 study     | 4              | 1.5          | 10.5 $\pm$ 0.9         | 4.57 $\pm$ 0.91         |
| 2014 study     | 5              | 0.5          | 11.7 $\pm$ 1.0         | 3.67 $\pm$ 1.26         |

\* An anti-RSV antibody, similar to Ab2, has a human half-life of approximately 23 days.
